# Supplementary material
Source: PubMed Central journal article supplement (PMC7960329)
Supplement: 13-00745.pdf [file 13-00745.pdf]

**On-line Table: Summary of statistical comparisons between histopathologic and DCE-MRI measures<sup>a</sup>**

| Histopathologic Features/<br>MRI Measure | $K^{trans}$<br>( $\text{min}^{-1}$ ) | $v_e$<br>(Unitless)                | $v_p$<br>(Unitless)     | $\text{EnF}_{\text{IAUC}_{60>0}}$<br>(Unitless) | $\text{EnF}_{\text{IAUC}_{60>2.5}}$<br>(Unitless) |
|------------------------------------------|--------------------------------------|------------------------------------|-------------------------|-------------------------------------------------|---------------------------------------------------|
| Necrosis                                 |                                      |                                    |                         |                                                 |                                                   |
| Frank                                    | 0.005 <sup>b</sup>                   | 0.694                              | 0.694                   | 0.264                                           | 0.088                                             |
| Geographic                               | 0.495                                | 0.655                              | 0.466                   | 0.384                                           | 0.796                                             |
| Cell density                             | 0.392                                | 0.165                              | 0.953                   | 0.455                                           | 0.169                                             |
| Cell atypia                              | 0.958                                | 0.629                              | 0.654                   | 0.630                                           | 0.149                                             |
| Mitotic activity                         | 0.400, $\rho = 0.166$                | 0.012, <sup>c</sup> $\rho = 0.470$ | 0.678, $\rho = -0.082$  | 0.729, $\rho = -0.069$                          | 0.744, $\rho = 0.065$                             |
| Infiltrates                              |                                      |                                    |                         |                                                 |                                                   |
| Lymphocytes                              | 0.353                                | 0.147                              | 0.911                   | 0.629                                           | 0.393                                             |
| Macrophages                              | 0.629                                | 0.738                              | 0.683                   | 0.629                                           | 0.970                                             |
| Tumor vascular patterns                  |                                      |                                    |                         |                                                 |                                                   |
| Hypertrophy                              | 0.592                                | 0.592                              | 0.153                   | 0.422                                           | 0.212                                             |
| Hyperplasia                              | 0.569                                | 0.787                              | 0.197                   | 0.787                                           | 0.418                                             |
| Glomeruloid                              | 0.394                                | 0.504                              | 0.504                   | 0.134                                           | 0.596                                             |
| Granulation tissue                       | 0.325                                | 0.896                              | 0.896                   | 0.015                                           | 0.076                                             |
| Large vessel                             | 0.164                                | 0.164                              | 0.137                   | 0.848                                           | 0.502                                             |
| Thrombosis                               | 0.472                                | 0.924                              | 0.632                   | 0.472                                           | 0.811                                             |
| Sclerosed                                | 0.293                                | 0.095                              | 0.155                   | 0.951                                           | 0.122                                             |
| Histologic patterns                      |                                      |                                    |                         |                                                 |                                                   |
| Fibrillar                                | 0.325                                | 0.007 <sup>b</sup>                 | 0.325                   | 0.793                                           | 0.212                                             |
| Gemistocytic                             | 0.937                                | 0.442                              | 0.614                   | 0.730                                           | 0.353                                             |
| Oligodendroglial                         | 0.155                                | 0.353                              | 0.757                   | 0.155                                           | 0.155                                             |
| Sarcomatous                              | 0.929                                | 0.789                              | 0.929                   | 0.372                                           | 0.592                                             |
| Giant cells                              | 0.697                                | 0.697                              | 0.976                   | 0.787                                           | 0.610                                             |
| Small cells                              | 0.970                                | 0.683                              | 0.911                   | 0.738                                           | 0.738                                             |
| Overall vascular score                   | 0.125                                | 0.759                              | 0.385                   | 0.214                                           | 0.278                                             |
| Vascular measures                        |                                      |                                    |                         |                                                 |                                                   |
| ESA ratio                                | 0.839, $\rho = 0.041$                | 0.809, $\rho = -0.049$             | 0.493, $\rho = -0.0138$ | 0.344, $\rho = -0.189$                          | 0.799, $\rho = -0.051$                            |
| VSA ratio                                | 0.919, $\rho = 0.020$                | 0.855, $\rho = -0.037$             | 0.495, $\rho = -0.137$  | 0.298, $\rho = -0.208$                          | 0.782, $\rho = -0.056$                            |
| VPC ( $\text{mm}^{-2}$ )                 | 0.224, $\rho = 0.242$                | 0.626, $\rho = -0.098$             | 0.119, $\rho = 0.307$   | 0.065, $\rho = 0.360$                           | 0.071, $\rho = 0.353$                             |

**Note:**—VPC indicates vascular profile count per square millimeter; VSA, vascular surface area; ESA, endothelial surface area.

<sup>a</sup> Mann-Whitney *U* tests were used for histologic parameters, which produce a binary classification (necrosis, infiltrates, vascular patterns, and histologic patterns), and multivariate analysis of variance was used for histologic features, which produces categorical scores (cell density, cell atypia, and overall vascular score). Spearman correlation analysis was performed to assess the relationship between MR imaging–derived parameters and quantitative histologic measures (mitotic activity, ESA, VSA, and VPC). Significance levels are shown, and Spearman  $\rho$  is shown for correlation analyses.

<sup>b</sup> Significance was  $P < .01$  (Mann-Whitney *U* and MANOVA).

<sup>c</sup> Significance was  $P < .05$  (Spearman correlation analysis).
